# Supplementary material
Source: publisher figshare collection journal article supplement (https://karger.figshare.com/ndownloader/files/22730666)
Supplement: Supplementary file 1 [file 22730666]

| Supplementary Table 1: ACE2 expression in kidney from Human Cell Landscape |                |      |        |             |           |                        |                                 |
|----------------------------------------------------------------------------|----------------|------|--------|-------------|-----------|------------------------|---------------------------------|
| Num                                                                        | Tissue         | Cont | Gender | Age         | Source    | Sample location        | ACE2 in subgroups               |
| 1                                                                          | Adult kidney 2 | 8877 | Male   | 66-year-old | Operation | Adjacent normal tissue | Proximal tubule cell            |
| 2                                                                          | Adult kidney 3 | 9966 | Male   | 41-year-old | DCD       | Partial tissue         | Proximal tubule cell            |
| 3                                                                          | Adult kidney 4 | 3849 | Male   | 57-year-old | Operation | Left kidney            | Proximal tubule cell            |
| 4                                                                          | Fetal kidney 3 | 4939 | Male   | 13-week-old | Abortion  | Intact tissue          | Proximal tubule progenitor cell |
| 5                                                                          | Fetal kidney 4 | 4511 | Male   | 11-week-old | Abortion  | Intact tissue          | Proximal tubule progenitor cell |
| 6                                                                          | Fetal kidney 5 | 9932 | Male   | 12-week-old | Abortion  | Intact tissue          | Proximal tubule progenitor cell |

**Table S1:** ACE2 expression in 3 adult and 3 fetal kidneys from Human Cell Landscape. The data is from the website:  
<http://bis.zju.edu.cn/HCL/index.html>
